# Supplementary material
Source: publisher site journal article supplement (https://www.dovepress.com/article/270247)
Supplement: Supplementary file 1 [file get_supplementary_file.php]

## Supplementary file 1- Search Strategy for PubMed

- 1.Aged (MESH)
- 2.Aged, 80 and over (MESH)
- 3.Frail elderly (MESH)
- 4.“Older adults” [tw]
- 5.“Older adult” [tw]
- 6.“Old adult” [tw]
- 7.“Old adults” [tw]
- 8.“Older people” [tw]
- 9.“Old people” [tw]
- 10.“Older persons” [tw]
- 11.“Older person” [tw]
- 12.“Old person” [tw]
- 13.“Old persons” [tw]
- 14.Senior [tw]
- 15.seniors[tw]
- 16.Elder[tw]
- 17.elderly [tw]
18. 1 OR 2 OR 3 OR 4 OR 5 OR 6 OR 7 OR 8 OR 9 OR 10 OR 11 OR 12 OR 13 OR 14 OR 15 OR 16 OR 17
19. Reablement [tw]
20. re-ablement [tw]
- 21.“restorative care” [tw]
- 22.“restorative home care” [tw]
- 23.“restorative home support” [tw] - - “restorative interventions” [tw]
- 24.“restorative intervention” [tw]
- 25.“active service model” [tw]
- 26.“home independence program” [tw]
- 27.“everyday rehabilitation” [tw] “home rehabilitation” [tw]
- 28.“home care rehabilitation” [tw]
- 29.“home-based rehabilitation” [tw]
- 30.home rehabilitation [ti, ab]
31. 19 OR 20 OR 21 OR 22 OR 23 OR 24 OR 25 OR 26 OR 27 OR 28 OR 29 OR 30
32. 18 AND 31

Filters: publication date between 1996- current.

Pub Med was searched September 24<sup>th</sup> 2018, with updated searches July 30<sup>th</sup> 2019 and June 20<sup>th</sup> 2020.

## Supplementary file 2 – Extended data extraction

| Author<br>Year<br>Country                        | Title                                                                                                                                                  | Aim                                                                                                                                                                                                                                        | Design/<br>method                 | Intervention                                                    | Comparison<br>intervention<br>(if applicable)            | Duration of<br>inter-<br>vention | HCPs                       | Reablement<br>receivers + mean<br>age each group<br>(SD)                                                                     | Sample size/<br>informants<br>(each group) | Characteristics of<br>general PA<br>facilitation                                                                      | Exercise<br>characteristics                                           | Experiences/<br>barriers<br>related to PA | Assessment<br>of physical<br>fitness                   | Assess-<br>ment of<br>PA<br>levels |
|--------------------------------------------------|--------------------------------------------------------------------------------------------------------------------------------------------------------|--------------------------------------------------------------------------------------------------------------------------------------------------------------------------------------------------------------------------------------------|-----------------------------------|-----------------------------------------------------------------|----------------------------------------------------------|----------------------------------|----------------------------|------------------------------------------------------------------------------------------------------------------------------|--------------------------------------------|-----------------------------------------------------------------------------------------------------------------------|-----------------------------------------------------------------------|-------------------------------------------|--------------------------------------------------------|------------------------------------|
| <b>Intervention studies - RCTs (n=8)</b>         |                                                                                                                                                        |                                                                                                                                                                                                                                            |                                   |                                                                 |                                                          |                                  |                            |                                                                                                                              |                                            |                                                                                                                       |                                                                       |                                           |                                                        |                                    |
| Burton et al. <sup>26</sup><br>2013<br>Australia | Effectiveness of a lifestyle exercise program for older people receiving a restorative home care service: a pragmatic randomized controlled trial      | To determine whether a lifestyle exercise program would be undertaken more often and result in greater functional gains than the current structured exercise program delivered as part of a restorative home care service for older adults | Parallel pragmatic RCT            | Restorative care + LIFE (lifestyle functional exercise program) | Restorative care + standard/ structured exercise program | 8 weeks                          | OTs<br>PTs<br>RNs<br>Aides | Participants of restorative care over 65 years, who were to have an exercise program. Mean age 80.2 (SD 6.4)/ 79.58 (SD 6.2) | 80 (40, 40)                                | Include promotion of active engagement in activities of daily living; care managers offered support and encouragement | Yes. Detailed descriptions provided, including intensity of exercises | Not reported                              | Functional reach<br>Sit-to stand<br>TUG<br>Tandem walk | Exercise adherence diary           |
| Burton et al. <sup>41</sup><br>2014<br>Australia | Long-term Benefits of a Lifestyle Exercise Program for Older People Receiving a Restorative Home Care Service: A Pragmatic Randomized Controlled Trial | To examine over the longer term, the effectiveness and maintenance of a (modified) lifestyle functional exercise program (LiFE) compared to the current, structured exercise program used in a restorative home care service               | Pragmatic RCT long term follow-up | Restorative care + LIFE (lifestyle exercise program)            | Restorative care + standard exercise program             | 8 weeks                          | OTs<br>PTs<br>RNs<br>Aides | Participants of restorative care over 65 years, who were to have an exercise program. Mean age 80.2 (SD 6.4)/ 79.58 (SD 6.2) | 80 (40, 40)                                | Refers to Burton 2013                                                                                                 | Same as Burton 2013                                                   | Not reported                              | Same as Burton 2013                                    | Exercise adherence diary           |

|                                                          |                                                                                                                              |                                                                                                                                                                                                           |                                |                                                                      |                 |                                 |                                                                                    |                                                                                                           |                |                                                                                                                                                                                                                                                    |                                                                                                                                                                                                                                     |              |                                   |    |
|----------------------------------------------------------|------------------------------------------------------------------------------------------------------------------------------|-----------------------------------------------------------------------------------------------------------------------------------------------------------------------------------------------------------|--------------------------------|----------------------------------------------------------------------|-----------------|---------------------------------|------------------------------------------------------------------------------------|-----------------------------------------------------------------------------------------------------------|----------------|----------------------------------------------------------------------------------------------------------------------------------------------------------------------------------------------------------------------------------------------------|-------------------------------------------------------------------------------------------------------------------------------------------------------------------------------------------------------------------------------------|--------------|-----------------------------------|----|
| Tuntland et al. <sup>29</sup><br>2015<br>Norway          | Reablement in community-dwelling older adults: a randomised controlled trial                                                 | To investigate the effectiveness of reablement in home-dwelling older adults compared with usual care in relation to daily activities, physical functioning, and health-related quality of life           | Parallel-group Superiority RCT | Reablement                                                           | Usual care      | Max 3 months (average: 10weeks) | OT<br>PT<br>Nurses<br>Auxiliary nurses<br>Assistants / students<br>Social educator | Adults >18 with functional decline in one or more activities. Mean age 79.9 (SD 10.4) /78.1 (SD 9.8)      | 61 (31,30)     | Training in daily activities such as dressing, food preparation, vacuuming, bus transport, visiting friends at a club, or being able to knit. HCPs encouraged and assisted in daily training and stimulated to perform daily activities themselves | Exercise programs were recommended as individual features, such as indoor or outdoor walking with or without walking aids, climbing stairs, transferring and performing exercises to improve strength, balance or fine motor skills | Not reported | TUG Grip strength                 | No |
| Lewin et al. <sup>27</sup><br>2013<br>Australia          | A randomised controlled trial of the Home Independence Program, an Australian restorative home-care program for older adults | To test the effectiveness of the Home Independence Program (HIP), a restorative home-care program for older adults, in reducing the need for ongoing services                                             | RCT                            | HIP (the home independence program). A restorative home-care program | Usual home care | Max 12 weeks                    | RNsOTsP<br>Ts<br>Support workers*                                                  | Older adults referred for home care, that have chosen to attend to HIP. Mean age 81.84 (7.19)/82.73(7.70) | 750 (375, 375) | Promotion of active engagement in daily activities.                                                                                                                                                                                                | Strength, balance and endurance programs for improving or maintaining mobility.                                                                                                                                                     | Not reported | TUG(Results for TUG not reported) | No |
| Whitehead et al. <sup>30</sup><br>2016<br>United Kingdom | Occupational Therapy in HomeCare Reablement Services (OTHERS): results of a feasibility randomized controlled trial          | To test the feasibility of conducting a randomized controlled trial (RCT) of an intervention targeted at activities of daily living (ADL), delivered by an occupational therapist, in homecare reablement | Feasibility parallel group RCT | Reablement + OT intervention                                         | Reablement      | 6 weeks +/-                     | Social care workers<br>Reablement team leader<br>OT                                | Adults with a need for homecare support. Mean age: 82.93 (9.02)/81.93 (12.96)                             | 30 (15/15)     | Practicing ADL-activities was part of the intervention                                                                                                                                                                                             | Not reported                                                                                                                                                                                                                        | Not reported | None                              | No |

|                                                     |                                                                                                                                                    |                                                                                                                                                                                                                                        |                                                             |                                                          |            |                                    |                                                                                                      |                                                                                                                                   |               |                                                                                                                                                                                                                                                                           |                                                                                                                                                                                                                |               |              |              |
|-----------------------------------------------------|----------------------------------------------------------------------------------------------------------------------------------------------------|----------------------------------------------------------------------------------------------------------------------------------------------------------------------------------------------------------------------------------------|-------------------------------------------------------------|----------------------------------------------------------|------------|------------------------------------|------------------------------------------------------------------------------------------------------|-----------------------------------------------------------------------------------------------------------------------------------|---------------|---------------------------------------------------------------------------------------------------------------------------------------------------------------------------------------------------------------------------------------------------------------------------|----------------------------------------------------------------------------------------------------------------------------------------------------------------------------------------------------------------|---------------|--------------|--------------|
| Parsons et al. <sup>28</sup><br>2018<br>New Zealand | Supported Discharge Teams for older people in hospital acute care: a randomised controlled trial                                                   | To determine whether older people referred to a Supported Discharge Team have: (i) reduced length-of-stay in hospital; (ii) reduced risk of hospital readmission; and (iii) reduced healthcare costs                                   | RCT                                                         | Supported discharge team                                 | Usual care | Max 6 weeks                        | Health care Assistants<br>RNs<br>PTs<br>OTs<br>Geriatrician                                          | Older hospitalized people >65 + additional eligibility criteria.<br>79.8 (7.2)/78.7(8.2)                                          | 183 (97,86)   | Utilize functional rehabilitation principles to maximize recovery through incorporating exercises within ADL tasks. Health care assistants provided up to 4 visits a day; 7 days a week following a program of graduated reduction of inputs.                             | Exercises progressively incorporated within ADL tasks, eg progressively increasing walking distance, sit-to stand, lying in bed to standing, carrying groceries home from shops and putting away in cupboards. | Not reported  | None         | No           |
| Hattori et.al. <sup>31</sup><br>2019<br>Japan       | Effects of Reablement on the Independence of Community-Dwelling Older Adults with Mild Disability: A Randomized Controlled Trial                   | To assess the efficacy of the CoMMIT program for older adults with mild disability                                                                                                                                                     | Parallel, two-arm, randomized controlled, superiority trial | Reablement + Standard care                               | Usual care | 5 months                           | PTs<br>OTs<br>Care managers                                                                          | Older adults with a current use of long-term care services. Median age 80.0                                                       | 375 (190/185) | Encouraged to regain physical activities and participation in ADL/IADL, based on motivational interviewing. Aimed to improve body function, activities and participation in accordance with the International Classification of Functioning, disability and health (ICF). | Not reported                                                                                                                                                                                                   | Not reported  | Not reported | Not reported |
| Jeon et.al. <sup>32</sup><br>2019<br>Australia      | Feasibility and potential effects of interdisciplinary reablement program (I-HARP) for people with cognitive and functional decline: a pilot trial | To test the feasibility and potential effects of I-HARP, which integrates evidence-based strategies and cognitive rehabilitation techniques into a dementia-specific, person-centred reablement package, within an Australian context. | Feasibility study; Parallel-group pilot RCT + Interviews    | I-HARP (Interdisciplinary Home-based Reablement Program) | Usual care | 4 months (up to 12 visits by HCPs) | OTs<br>RNs<br>Neuropsychologist. (Additional allied health services were recommended when necessary) | Older adults (≥60) with early/moderate stage dementia and difficulties in ADL or IADL. Mean age 79 (range 64-85)/81 (range 74-91) | 18 (9/9)      | Not reported                                                                                                                                                                                                                                                              | Balance and strength exercises were included as needed                                                                                                                                                         | Some reported | Not reported | Not reported |

| Intervention studies - not RCTs (n=8)           |                                                                                                                                         |                                                                                                                                                                                                                                                                                                                              |                                                    |                                                                                                                |                                        |                                                                           |                      |                                                                                                                     |                  |                                                                                                                          |                                                                                                                   |              |                                                |    |
|-------------------------------------------------|-----------------------------------------------------------------------------------------------------------------------------------------|------------------------------------------------------------------------------------------------------------------------------------------------------------------------------------------------------------------------------------------------------------------------------------------------------------------------------|----------------------------------------------------|----------------------------------------------------------------------------------------------------------------|----------------------------------------|---------------------------------------------------------------------------|----------------------|---------------------------------------------------------------------------------------------------------------------|------------------|--------------------------------------------------------------------------------------------------------------------------|-------------------------------------------------------------------------------------------------------------------|--------------|------------------------------------------------|----|
| Lewin et al. <sup>34</sup><br>2010<br>Australia | A non-randomised controlled trial of the Home Independence Program (HIP): an Australian restorative program for older home-care clients | To compare programs for personal (functional gain and well-being) and service outcomes                                                                                                                                                                                                                                       | Non-randomized controlled trial                    | HIP (the home independence program). A restorative home-care program                                           | Usual care                             | Up to 12 weeks (with some exceptions). Average length of stay was 62 days | Nurses<br>PTs<br>OTs | Older clients over 60 years, referred for home-care services. Mean age: 79.6 (SD 7.8)/79.8 (SD 3.9)                 | 200 (100/100)    | Interventions included promotion of active engagement in a range of daily living activities                              | Interventions included strength, balance and endurance programs for improving or maintaining mobility             | Not reported | TUG                                            | No |
| Whitney et al. <sup>37</sup><br>2015<br>USA     | Outcomes of usual versus a specialized falls and balance program in the home                                                            | To determine if there was a difference in Outcome and Information Data Set (OASIS-C) activities of daily living (ADL) outcomes as well as the duration and number of home care visits between usual home care rehabilitation services and a home care rehabilitation team that was specially trained in falls identification | Retro-spective quasi-experimental two-group design | Usual home care rehabilitation service specially trained in falls identification and prevention (Safe Strides) | Usual home care rehabilitation service | Mean duration in intervention group was 52.6 days                         | Nurses<br>PTs<br>OTs | People receiving Medicare beneficiaries. Mean age 81.4 (9.9)/79.9 (10.7)                                            | 3902 (2121/1781) | Not specifically reported                                                                                                | Targeted exercise programs focusing on improving mobility and safety in the home were mentioned in the discussion | Not reported | TUG is mentioned, but results are not reported | No |
| Winkel et al. <sup>39</sup><br>2015<br>Denmark  | Reablement in a community setting                                                                                                       | To evaluate if a home-based reablement program influenced the ADL ability of older adults                                                                                                                                                                                                                                    | Non-randomized pilot study                         | Reablement                                                                                                     | (No comparison)                        | 12 weeks                                                                  | Home carer<br>OT     | Older adults >65 years applying for home care services or an increase of home care services. Mean age 79.6 (SD 8.8) | 91               | The role of the home carer was to verbally and physically support and motivate the participant to perform the ADL tasks. | Not mentioned                                                                                                     | Not reported | None                                           | No |

|                                                       |                                                                                                          |                                                                                                                                                                            |                                                              |                  |                 |                                      |                                                          |                                                                                                                                                                                        |                   |                                                                                                                                                                                      |                                                                                                                                                                                                                         |              |      |      |
|-------------------------------------------------------|----------------------------------------------------------------------------------------------------------|----------------------------------------------------------------------------------------------------------------------------------------------------------------------------|--------------------------------------------------------------|------------------|-----------------|--------------------------------------|----------------------------------------------------------|----------------------------------------------------------------------------------------------------------------------------------------------------------------------------------------|-------------------|--------------------------------------------------------------------------------------------------------------------------------------------------------------------------------------|-------------------------------------------------------------------------------------------------------------------------------------------------------------------------------------------------------------------------|--------------|------|------|
| Tinetti et al. <sup>35</sup><br>2002<br>USA           | Evaluation of restorative care vs usual care for older adults receiving an acute episode of home care    | To compare functional status and the likelihood of remaining at home for persons receiving restorative care vs usual home care.                                            | Controlled clinical trial                                    | Restorative care | Usual home care | 3 months                             | Nurses<br>PTs<br>OTs<br>Home health staff                | Older persons >65 at risk for functional decline after acute illness or hospitalization who were referred to the restorative and usual care offices.<br>Mean age 78.8 (6.9)/78.8 (6.9) | 1382<br>(691,691) | Not reported                                                                                                                                                                         | The treatment plan included various combinations of exercises and training (not further elaborated, refers to Baker 2001)                                                                                               | Not reported | No   | No   |
| Tinetti et al. <sup>36</sup><br>2012<br>USA           | Effect of a Restorative Model of Posthospital Home Care on Hospital Readmissions                         | To compare readmissions of Medicare recipients of usual home care and a matched group of recipients of a restorative model of home care.                                   | Quasi-experimental; matched and unmatched                    | Restorative care | Usual home care | Mean duration 20.3 days +- 14.8 days | Nurses<br>PTs<br>OTs<br>Home health staff                | People >65 receiving home care after hospitalization<br>Mean age 77.4 (6.7)/ 77.0 (6.7)                                                                                                | 770 (410/360)     | Treatment plans targeted physical impairments and tasks of daily living. Included training and counseling of participant, family and caregivers (content of training not specified). | Treatment plan included various combinations of exercise (Refers to Baker 2001 for further description of intervention)                                                                                                 | Not reported | None | No   |
| Langeland et al. <sup>33</sup><br>2019<br>Norway      | A multicenter investigation of reablement in Norway: a clinical controlled trial                         | To investigate the effects of reablement in home-dwelling adults on daily activities, physical function, health-related quality of life and coping as a sense of coherence | Multicenter clinical controlled trial (in 36 municipalities) | Reablement       | Standard care   | 4-10 weeks; (mean 5.7 weeks)         | OTs<br>PTs<br>Nurses<br>Auxiliary nurses<br>Home helpers | Home-dwelling adults >18 that recently had experienced functional decline.<br>Mean age: 78.2 (11.2)/79.5 (9.3)                                                                         | 828<br>(707/121)  | Intensive attention was given to encourage participation and stimulate daily training for the participants, including performing their daily tasks themselves.                       | Exercise programs such as performing exercises to improve strength, balance, or fine motor skills. The exercises will be incorporated into daily routines and the participant will be encouraged to train on their own. | Not reported | SPPB | None |
| Slater et al. <sup>38</sup><br>2018<br>United Kingdom | An evaluation of the reablement service programme on physical ability, care needs and care plan packages | To examine the impact of reablement on physical independence, care plans and care packages post-discharge for older adults                                                 | A retrospective cohort design                                | Reablement       | No comparison   | 6 weeks*                             | OTs<br>Health care assistants                            | Reablement receivers >18 years. Mean age: 76.5 (10.8)                                                                                                                                  | 416               | Not reported                                                                                                                                                                         | Not reported                                                                                                                                                                                                            | Not reported | No   | No   |

|                                                          |                                                                                                            |                                                                                                                                                                                                                              |                                                                                         |                                                                      |                                 |                                                                        |                                      |                                                                                                            |                                                                  |                                                        |              |                                                                                |     |      |
|----------------------------------------------------------|------------------------------------------------------------------------------------------------------------|------------------------------------------------------------------------------------------------------------------------------------------------------------------------------------------------------------------------------|-----------------------------------------------------------------------------------------|----------------------------------------------------------------------|---------------------------------|------------------------------------------------------------------------|--------------------------------------|------------------------------------------------------------------------------------------------------------|------------------------------------------------------------------|--------------------------------------------------------|--------------|--------------------------------------------------------------------------------|-----|------|
| Beresford et al. <sup>40</sup><br>2019<br>United Kingdom | Outcomes of reablement and their measurement: Findings from an evaluation of English reablement services   | To report a prospective cohort study of older people receiving reablement in England.                                                                                                                                        | Prospective cohort study                                                                | Three different reablement services                                  | No comparison                   | Planned duration was typically 6 weeks, average duration was 3.9 weeks | OTs<br>Health care assistants        | Reablement receivers. Mean age 80.85 (SD9.1)/80.83 (SD 9.0)/81 (8.8)                                       | 186                                                              | Not reported                                           | Not reported | Not reported                                                                   | No  | No   |
| <b>Mixed method studies/other (n=4)</b>                  |                                                                                                            |                                                                                                                                                                                                                              |                                                                                         |                                                                      |                                 |                                                                        |                                      |                                                                                                            |                                                                  |                                                        |              |                                                                                |     |      |
| Burton et al. <sup>42</sup><br>2013<br>Australia         | Barriers and Motivators to Being Physically Active for Older Home Care Clients                             | To identify the motivators and barriers to being physically active for older people receiving either restorative or "usual" home care services                                                                               | Cross-sectional mixed method study using questionnaire and interviews                   | HIP (the home independence program). A restorative home-care program | Usual home care services (HACC) | Minimum 4 weeks, generally 6-12 weeks                                  | RNs<br>OTs<br>PTs<br>Aides*          | People Aged 70+ that had received HIP/HACC                                                                 | Questionnaire : 506 older adults.<br>Interviews: 20 older adults | Not reported                                           | Not reported | Facilitators/ barriers for PA among previous reablement receivers are reported | N/A | PASE |
| Whitehead et al. <sup>44</sup><br>2018<br>United Kingdom | Content and acceptability of an Occupational Therapy intervention in HomeCare Reablement Services (OTHERS) | To provide a detailed description of the content of the occupational therapy intervention that was provided in the OTHERS trial, and to evaluate whether the intervention was acceptable to the participants who received it | Feasibility/ evaluation study (Part of a feasibility RCT); questionnaire and interviews | OT intervention within reablement service                            | N/A                             | Median length of reablement episode was 56 days (range: 20-126 days)   | OT<br>Social care reablement workers | Receivers of home care reablement services. Mean age 83 (8.9) in questionnaire, 82.4 (9.86) in interviews. | Interviews: 5 older adults<br>Questionnaire : 8 older adults     | Practicing ADL activities was included in intervention | Not reported | Some reported                                                                  | No  | No   |

|                                                  |                                                                                                                             |                                                                                                                                                                                                                                                     |                                                                                                  |                                                                 |     |                                                       |                                          |                                                                                                                                     |                                                                                                                                                                                                       |                                                                                                                                                                 |                                                                                                                                                                                                                                                                                              |               |                                               |                                                      |
|--------------------------------------------------|-----------------------------------------------------------------------------------------------------------------------------|-----------------------------------------------------------------------------------------------------------------------------------------------------------------------------------------------------------------------------------------------------|--------------------------------------------------------------------------------------------------|-----------------------------------------------------------------|-----|-------------------------------------------------------|------------------------------------------|-------------------------------------------------------------------------------------------------------------------------------------|-------------------------------------------------------------------------------------------------------------------------------------------------------------------------------------------------------|-----------------------------------------------------------------------------------------------------------------------------------------------------------------|----------------------------------------------------------------------------------------------------------------------------------------------------------------------------------------------------------------------------------------------------------------------------------------------|---------------|-----------------------------------------------|------------------------------------------------------|
| Burton et al. <sup>43</sup><br>2014<br>Australia | Determining the Feasibility of a Lifestyle Activity Program for Inclusion in a Restorative Home Care Service: A Pilot Study | To determine whether a lifestyle and functional exercise program (LiFE) was suitable for delivery in a restorative home care service.                                                                                                               | Feasibility study; Pilot intervention study, including interviews with clients and care managers | Restorative care + LIFE (lifestyle functional exercise program) | N/A | Average 7-8 weeks                                     | RNs<br>OTs<br>PTs<br>Aides*              | Older adults (aged 60 or older) receiving and assessed as requiring an exercise program by their care manager. Mean age 80.8 (5.87) | 9 clients                                                                                                                                                                                             | Physical activity program was one of several key components. The care managers discussed how the exercises might fit into the client's routine daily activities | Exercises incorporated into daily activities. An individually targeted Lifestyle exercise program as intervention, including strength and balance activities; a standardized exercise program as comparative intervention. Manual delivered, including guidance on how to progress exercises | Some reported | Functional reach Sit-to-Stand TUG Tandem walk | PASE Actual accelerometer Activity assessment sheets |
| Baker et al. <sup>45</sup><br>2001<br>USA        | The design and implementation of a restorative care model for home care                                                     | To describe the development of a restorative model of home care designed to integrate medical treatments for acute conditions with personal care and rehabilitation for chronic disabilities in order to improve older adults' functional outcomes. | Description of design and implementation of a restorative care model                             | Restorative care model for home care                            | N/A | Mean duration of the Restorative care was 24.8 days * | Nurses<br>PTs<br>OT<br>Home health aides | People receiving home care, of whom 75% were >65 years.                                                                             | Model development within a branch of a home care agency. Work group included two researchers (RN, PT), two RNs, 2 PTs, two home health aides. Staff and six older adults participated in focus groups | Supporting older adults perform activities themselves. Help patients safely practice regaining function. Includes a focus on prevention of sedentary behavior.  | HHAs were trained to help patients follow through on prescribed exercises and gait and transfer training.                                                                                                                                                                                    | Some reported | Not reported                                  | Not reported                                         |

**Quantitative studies (n=4)**



|                                                  |                                                                                                       |                                                                                                                                                                                                                                                                                                                            |                                                                                                    |                                                                      |                                |                                                      |                                                        |                                                                             |                            |                                                                                                                                                                    |                                                                                                                                                             |                                                                                                                                                                                                                       |                                                 |      |
|--------------------------------------------------|-------------------------------------------------------------------------------------------------------|----------------------------------------------------------------------------------------------------------------------------------------------------------------------------------------------------------------------------------------------------------------------------------------------------------------------------|----------------------------------------------------------------------------------------------------|----------------------------------------------------------------------|--------------------------------|------------------------------------------------------|--------------------------------------------------------|-----------------------------------------------------------------------------|----------------------------|--------------------------------------------------------------------------------------------------------------------------------------------------------------------|-------------------------------------------------------------------------------------------------------------------------------------------------------------|-----------------------------------------------------------------------------------------------------------------------------------------------------------------------------------------------------------------------|-------------------------------------------------|------|
| Burton et al. <sup>46</sup><br>2013<br>Australia | Physical activity levels of older adults receiving a home care service                                | To compare the activity levels of older people who had received a restorative home care service with those of people who had received "usual" home care, explore the predictors of physical activity in these 2 groups, and determine whether either group met the minimum recommended activity levels for their age group | Cross-sectional descriptive questionnaire study                                                    | HIP (the home independence program). A restorative home-care program | Home and Community care (HACC) | Generally 6-12 weeks                                 | RNs<br>OTs<br>PTs<br>Aides*                            | Older adults >70 years that previously had received HIP or HACC             | 506 Older adults (215,291) | A third (n = 63) of HIP clients, compared with 24.8% (n = 62) of HACC clients, reported having been encouraged to be more physically active by their care manager. | 30% (n = 43) of the HIP clients could recall being given an activity program as part of their home care service, compared to 7.7% (n = 15) of HACC clients. | Over three quarters of both HIP (76.7%, n = 135) and HACC (78.5%, n = 172) respondents were sufficiently active as defined by the Australian government's recommendations (minimum 30 min moderate exercise each day) | No                                              | PASE |
| Tuntland et al. <sup>48</sup><br>2017<br>Norway  | Predictors of outcomes following reablement in community-dwelling older adults                        | To determine the potential factors that predict occupational performance and satisfaction with that performance at 10 weeks follow-up.                                                                                                                                                                                     | Prospective cohort study; pre-post analysis of outcome data from a clinical trial (Langeland 2019) | Reablement                                                           | N/A                            | Max 3 months                                         | OT<br>PT<br>nurse<br>Auxiliary<br>nurse<br>Home helper | Adults >18 years that had experienced a functional decline                  | 712 Reablement receivers   | Same as Langeland 2019                                                                                                                                             | Same as Langeland 2019                                                                                                                                      | Not reported                                                                                                                                                                                                          | SPPB (only baseline walking speed reported)     | No   |
| Tuntland et al. <sup>47</sup><br>2019<br>Norway  | Everyday occupations prioritised by older adults participating in reablement. A cross-sectional study | To explore which occupations older people with functional decline find important to improve, which of these they prioritize as their rehabilitation goals, and what factors are associated with these priorities                                                                                                           | A cross-sectional study based on data from a nationwide trial (Langeland 2019)                     | Reablement                                                           | N/A                            | Mean 5.7 weeks (majority between four and six weeks) | OT<br>PT<br>nurse<br>Auxiliary<br>nurse<br>Home helper | >65, home-dwelling, experiencing functional decline. Mean age 81.2 (SD 6.9) | 738 reablement receivers   | Same as Langeland 2019                                                                                                                                             | Same as Langeland 2019                                                                                                                                      | Not reported                                                                                                                                                                                                          | Baseline walking speed reported (based on SPPB) | No   |

|                                                               |                                                                                                                                         |                                                                                                                                                                                                                                                                           |                                                                                              |            |     |                                                           |                                                                                                                         |                                                   |                                                                                       |                                                                                                                                  |                       |              |                                                                             |              |
|---------------------------------------------------------------|-----------------------------------------------------------------------------------------------------------------------------------------|---------------------------------------------------------------------------------------------------------------------------------------------------------------------------------------------------------------------------------------------------------------------------|----------------------------------------------------------------------------------------------|------------|-----|-----------------------------------------------------------|-------------------------------------------------------------------------------------------------------------------------|---------------------------------------------------|---------------------------------------------------------------------------------------|----------------------------------------------------------------------------------------------------------------------------------|-----------------------|--------------|-----------------------------------------------------------------------------|--------------|
| Zingmark et.al. <sup>49</sup><br>2020<br>Sweden               | Characteristics of occupational therapy and physiotherapy within the context of reablement in Swedish municipalities: A national survey | To explore the characteristics and differences of occupational therapy and physiotherapy in terms of focus (what the intervention was aimed to improve), content (what actions were implemented) and duration within the context of reablement in Swedish municipalities. | Surveys                                                                                      | Reablement | N/A | In most cases the duration was within a period of 6 weeks | OTs<br>PTs<br>home care staff<br>Collaboration with other professionals, e.g. district nurses, social workers, managers | Adults, mean age: 78.4 years                      | 1,393 OTs, 1,005 PTs                                                                  | OTs focused mostly on activities such as walking indoors and self-care. PTs focused mainly on walking indoors and body function. | Not reported          | Not reported | Tests for balance, strength and mobility were reported by PTs in some cases | Not reported |
| <b>Qualitative studies; professionals perspectives (n=18)</b> |                                                                                                                                         |                                                                                                                                                                                                                                                                           |                                                                                              |            |     |                                                           |                                                                                                                         |                                                   |                                                                                       |                                                                                                                                  |                       |              |                                                                             |              |
| Hjelle et al. <sup>59</sup><br>2016<br>Norway                 | The reablement team's voice: a qualitative study of how an integrated multidisciplinary team experiences participation in reablement    | To explore and describe how an integrated multidisciplinary team in Norway experienced participation in reablement                                                                                                                                                        | Focus groups. Qualitative phenomenological hermeneutic study. Part of an RCT (Tuntland 2015) | Reablement | N/A | Max 3 months                                              | OTsPTsSocial educators<br>NursesAuxiliary nursesAssistants                                                              | Home-dwelling adults (main focus on older adults) | 14 HCPs; 1 physio, 2 OT, 1 social educator, 2 nurses, 2 auxiliary nurse, 6 assistants | Same as Tuntland 2015                                                                                                            | Same as Tuntland 2015 | Not reported | Not reported                                                                | Not reported |

|                                                  |                                                                                                         |                                                                                                                                     |                                                                                                                   |                         |     |                                                                     |                                                                                    |                                                                                       |                                                                                                |                                                                             |                                                                                      |               |              |              |
|--------------------------------------------------|---------------------------------------------------------------------------------------------------------|-------------------------------------------------------------------------------------------------------------------------------------|-------------------------------------------------------------------------------------------------------------------|-------------------------|-----|---------------------------------------------------------------------|------------------------------------------------------------------------------------|---------------------------------------------------------------------------------------|------------------------------------------------------------------------------------------------|-----------------------------------------------------------------------------|--------------------------------------------------------------------------------------|---------------|--------------|--------------|
| Hjelle et al. <sup>58</sup><br>2018<br>Norway    | Reablement teams' roles: a qualitative study of interdisciplinary teams' experiences                    | To explore and describe the roles of interdisciplinary teams in reablement services in a Norwegian setting                          | Focus group discussions and interviews. Qualitative approach drawing on hermeneutic and phenomenological methods. | Reablement              | N/A | Max 3 months in the rural setting, max 4 weeks duration in the city | OTs<br>PTs<br>Social educators<br>Nurses<br>Auxiliary nurses<br>Care assistants    | Older adults                                                                          | 27 HCPs (PTs, OTs, Nurses, Auxiliary nurses)                                                   | Same as Tuntland 2015                                                       | Same as Tuntland 2015                                                                | Some reported | Not reported | Not reported |
| Birkeland et al. <sup>50</sup><br>2017<br>Norway | Interdisciplinary collaboration in reablement—a qualitative study                                       | To elucidate how the interdisciplinary collaboration in reablement worked in a Norwegian context                                    | Focus groups, part of a national evaluation project (Langeland 2016)                                              | Reablement              | N/A | 3 weeks - 3 months (mostly 3-4 weeks)*                              | PTs<br>OTs<br>Nurses<br>Social educators<br>Auxiliary nurses<br>Social workers     | Mostly older adults 65 years and above*                                               | 33 HCPs (9 PTs, 9 nurses, 7 OTs, 4 social educators, 3 auxiliary nurses and one social worker) | Not reported                                                                | Not reported                                                                         | Not reported  | Not reported | Not reported |
| Moe et al. <sup>63</sup><br>2016<br>Norway       | Interdisciplinary collaboration experiences in creating an everyday rehabilitation model: a pilot study | To gain knowledge about employees' experiences with establishing a new multidisciplinary team and developing a team based work mode | Focus groups                                                                                                      | Everyday rehabilitation | N/A | 6 weeks (with some exceptions)*                                     | OT<br>Care workers<br>Nurse<br>PT                                                  | Older adults                                                                          | 6 HCPs (One OT, two care workers, a nurse, a PT and a project leader)                          | Not reported                                                                | Not reported                                                                         | Not reported  | Not reported | Not reported |
| Jakobsen et al. <sup>60</sup><br>2018<br>Norway  | Health professionals' perspectives of next of kin in the context of reablement                          | To describe health professionals' perspectives of next of kin in the context of reablement.                                         | Focus groups. Constructivist grounded theory approach                                                             | Reablement              | N/A | Often 4-6 weeks                                                     | PTs<br>OTs<br>RNs<br>Social educators<br>Other employees of the home care services | Older adults +65 years that already received home care services or referred otherwise | 49 HCPs (Registered nurses, Health workers, OTs, students, PTs, Social educators)              | Professionals assisted the older adults with practicing everyday activities | Professionals assisted the older adults with an individual physical training program | Some reported | Not reported | Not reported |

|                                                   |                                                                                                              |                                                                                                                                               |                                                                                              |                          |     |                                                                  |                                                                       |                                                     |                                                                                                                                   |                                                                                               |              |               |              |              |
|---------------------------------------------------|--------------------------------------------------------------------------------------------------------------|-----------------------------------------------------------------------------------------------------------------------------------------------|----------------------------------------------------------------------------------------------|--------------------------|-----|------------------------------------------------------------------|-----------------------------------------------------------------------|-----------------------------------------------------|-----------------------------------------------------------------------------------------------------------------------------------|-----------------------------------------------------------------------------------------------|--------------|---------------|--------------|--------------|
| Gustafsson et al. <sup>56</sup><br>2019<br>Sweden | Working with short-term goal-directed reablement with older adults: Strengthened by a collaborative approach | To illuminate the meaning of working with short-term goal-directed reablement of older adults as experienced by an interprofessional team     | Written narratives from staff were analyzed in relation to a randomized intervention project | Reablement               | N/A | 3 months                                                         | RNs<br>Nurses<br>OTs<br>PTs<br>Social worker                          | Older adults                                        | 20 HCPs (1 RN, 13 enrolled nurses, 2 PTs, 3 OTs, 1 social worker)                                                                 | Not reported                                                                                  | Not reported | Not reported  | Not reported | Not reported |
| Jokstad et al. <sup>61</sup><br>2018<br>Norway    | Ideal and reality; Community healthcare professionals' experiences of user-involvement in reablement         | To explore healthcare professionals' experiences of user-involvement in reablement                                                            | Focus groups                                                                                 | Reablement               | N/A | Up to 6 weeks                                                    | Nurse assistants<br>Nurses<br>PTs<br>OTs                              | Older adults                                        | 18 HCPs (6 nurses, 6 nurse assistants, 3 OTs, 3 PTs)                                                                              | Not reported                                                                                  | Not reported | Not reported  | Not reported | Not reported |
| Meldgaard Hansen <sup>62</sup><br>2016<br>Denmark | Rehabilitative bodywork: cleaning up the dirty work of homecare                                              | To analyze and discuss how the bodywork of homecare develops and is framed as clean, non-dirty work in the context of rehabilitative homecare | Ethnographic fieldwork                                                                       | Rehabilitative home care | N/A | Average of 8 weeks in one unit, not specified in the other unit* | PTs<br>OTs<br>Nurses<br>Social and health-care workers                | Older adults                                        | Two home care units; 30 interviews with homecare workers, managers and administrators, shadow observations of 20 homecare workers | Not reported                                                                                  | Not reported | Some reported | Not reported | Not reported |
| Bødker et al. <sup>52</sup><br>2018<br>Denmark    | Potentiality made workable—exploring logics of care in reablement for older people                           | To explore how elder-care professionals translate the abstract notion of 'potentiality' into practice.                                        | Ethnographic field study                                                                     | Reablement               | N/A | 8 weeks (info from more recent study)                            | Assessors<br>Therapist<br>Nurses<br>Health and social care assistants | Participants from one municipality. 67-94 years old | Two municipal units, more than 50 HCPs and 31 older people (of which 8 received reablement). Interviews with 13 HCPs              | Training and performing activities (either leisure activities or ADL/domestic) are mentioned. | Not reported | Not reported  | Not reported | Not reported |

|                                                 |                                                                                                     |                                                                                                                                       |                                                   |            |     |                                    |                                                    |                                                 |                                         |                                                                                                                                                                                       |                                                                                                                                                                                                                             |               |                                                                                           |              |
|-------------------------------------------------|-----------------------------------------------------------------------------------------------------|---------------------------------------------------------------------------------------------------------------------------------------|---------------------------------------------------|------------|-----|------------------------------------|----------------------------------------------------|-------------------------------------------------|-----------------------------------------|---------------------------------------------------------------------------------------------------------------------------------------------------------------------------------------|-----------------------------------------------------------------------------------------------------------------------------------------------------------------------------------------------------------------------------|---------------|-------------------------------------------------------------------------------------------|--------------|
| Eliassen et al. <sup>54</sup><br>2018<br>Norway | Variations in physiotherapy practices across reablement settings                                    | To explore how physiotherapy practice is performed in reablement settings and the content of the service provided to reablement users | Field study, including observation and interviews | Reablement | N/A | 4-6 weeks (with some exceptions) * | PTs<br>OTs<br>Nurses<br>Home trainers/assistants * | 7 reablement participants included in the study | 7 PTs and 7 home trainers (+ 7 clients) | Daily activities were included in reablement plans and could involve getting dressed, showering, and walking to the grocery store (see also Eliassen 2018 b and 2018 c)               | Exercises were provided in all teams, either as standardized exercises or individual adapted exercises. The exercises mainly targeted balance, leg strength, and gait endurance (see also Eliassen 2018 b, 2018 c and 2020) | Some reported | SPPB was used in all cases.<br><br>+ extended examinations and assessments in some teams. | Not reported |
| Eliassen et al. <sup>53</sup><br>2018<br>Norway | The practice of support personnel, supervised by physiotherapists, in Norwegian reablement services | To explore how the home trainers follow up instructions and supervision by PTs in reablement                                          | Field study, including observation and interviews | Reablement | N/A | 4-6 weeks (with some exceptions) * | PTs<br>OTs<br>Nurses<br>Home trainers/assistants * | 7 reablement participants included in the study | 7 PTs and 7 home trainers (+ 7 clients) | Some teams emphasized daily activities in the reablement plan, while in other teams the focus were mainly on exercises, not activity-based goals. (see also Eliassen 2018a and 2018c) | In some teams minimal adjustments and progression of standardized exercise programs were made. In other teams movement quality and adaptation of exercises were more emphasized.(see also Eliassen 2018a, 2018c and 2020)   | Some reported | Not reported                                                                              | Not reported |
| Eliassen et al. <sup>55</sup><br>2018<br>Norway | Physiotherapy supervision of home trainers in interprofessional reablement teams                    | To explore the content of PTs' supervision of home trainers in reablement teams                                                       | Field study, including observation and interviews | Reablement | N/A | 4-6 weeks (with some exceptions) * | PTs<br>OTs<br>Nurses<br>Home trainers/assistants * | 7 reablement participants included in the study | 7 PTs and 7 home trainers (+ 7 clients) | Same as Eliassen 2018a and 2018b)                                                                                                                                                     | Same as Eliassen 2018a and 2018b)                                                                                                                                                                                           | Some reported | Not reported                                                                              | Not reported |

|                                                |                                                                                                                          |                                                                                                                                                                                                                                                 |                                            |                          |     |                                                            |                                                                 |                                                                                  |                                                                                                                           |                                                                                                                                                                          |              |               |              |              |
|------------------------------------------------|--------------------------------------------------------------------------------------------------------------------------|-------------------------------------------------------------------------------------------------------------------------------------------------------------------------------------------------------------------------------------------------|--------------------------------------------|--------------------------|-----|------------------------------------------------------------|-----------------------------------------------------------------|----------------------------------------------------------------------------------|---------------------------------------------------------------------------------------------------------------------------|--------------------------------------------------------------------------------------------------------------------------------------------------------------------------|--------------|---------------|--------------|--------------|
| Moe et al. <sup>64</sup><br>2017<br>Norway     | Tailoring reablement: A grounded theory study of establishing reablement in a community setting in Norway                | To generate a grounded theory of practitioners' patterns of action when establishing reablement                                                                                                                                                 | Grounded theory/ field study               | Reablement               | N/A | Average duration of 6 weeks, maximal duration of 6 months* | Nurse<br>OTs<br>PTs<br>Nurse assistants                         | Seniors                                                                          | 17 informants (Reablement team, project manager, home care managers, key individuals for establishing reablement service) | Not reported                                                                                                                                                             | Not reported | Not reported  | Not reported | Not reported |
| Hansen et al. <sup>57</sup><br>2018<br>Denmark | From Carers to Trainers: Professional Identity and Body Work in Rehabilitative Eldercare                                 | To explore how a nationwide reform initiative, calling for a rehabilitative, activating and 'training' approach to elderly people in Danish homecare services, may transform gendered and embodied conceptions of 'the professional care worker | Ethno-graphic case study                   | Rehabilitative eldercare | N/A | Average of 8 weeks                                         | Social and healthcar e helpers (home trainers)<br>PTs<br>OTs    | Older adults                                                                     | Unit of 29 HCPs; Shadowing nine home trainers, four therapists (including visits to citizens and interviews)              | Encouragement of doing tasks themselves ('standing with hands behind my back')                                                                                           | Not reported | Not reported  | Not reported | Not reported |
| Bodker et al. <sup>51</sup><br>2019<br>Denmark | What constitutes 'good care' and 'good carers'? The normative implications of introducing reablement in Danish home care | To explore how transitioning from compensatory care to reablement care is not merely a practical process, but also a deeply normative one                                                                                                       | Ethno-graphic field work                   | Reablement               | N/A | 8 weeks                                                    | OTs<br>RNs<br>PTs<br>Social and health-care helpers/ assistants | People >65 years in need of assistance with practical tasks and/or personal care | One municipality, involving 31 older people (of which 8 received reablement) Interviews with 13 HCPs                      | Individualized reablement program includes reablement training. Home helper (upon instruction by the program manager) works to re-enable the older person to manage ADLs | Not reported | Some reported | Not reported | Not reported |
| Jokstad et al. <sup>61</sup><br>2019<br>Norway | Ideal and reality; Community healthcare professionals' experiences of user-involvement in reablement                     | To explore healthcare professionals' experiences of user-involvement in reablement                                                                                                                                                              | Focus groups. Qualitative content analysis | Reablement               | N/A | Up to 6 weeks                                              | OTs<br>PTs<br>RNs<br>Nurse assistants                           | Older adults                                                                     | 18 HCPs (6 nurse assistants, 6 nurses, 3 PTs, 3 OTs)                                                                      | Not reported                                                                                                                                                             | Not reported | Not reported  | Not reported | Not reported |

|                                                              |                                                                                                                             |                                                                                                                                            |                                                                                |            |     |                                                      |                                                                                    |                                                 |                                                                                                                                                              |                                                                                                                                                                                    |                                                                |               |              |              |
|--------------------------------------------------------------|-----------------------------------------------------------------------------------------------------------------------------|--------------------------------------------------------------------------------------------------------------------------------------------|--------------------------------------------------------------------------------|------------|-----|------------------------------------------------------|------------------------------------------------------------------------------------|-------------------------------------------------|--------------------------------------------------------------------------------------------------------------------------------------------------------------|------------------------------------------------------------------------------------------------------------------------------------------------------------------------------------|----------------------------------------------------------------|---------------|--------------|--------------|
| Liaanen et al. <sup>65</sup><br>2019<br>Norway               | Becoming an enabler of everyday activity: Health professionals in home care services experiences of working with reablement | To provide knowledge regarding how home care service providers working with reablement in the home care setting describe their experiences | Focus groups, grounded theory approach                                         | Reablement | N/A | Time-limited within 6-8 weeks, with some exceptions* | OTs<br>PTs<br>RNs<br>Other home care staff                                         | Older adults                                    | 25 HCPs (2 OTs, 11, RNs, 4 Health workers, 1 Specialist auxiliary nurse, 4 auxiliary nurses, 1 student nurse, 1 Trainee health worker and 1 social educator) | Not reported                                                                                                                                                                       | Not reported                                                   | Some reported | Not reported | Not reported |
| Eliassen et al. <sup>66</sup><br>2020<br>Norway              | Enhancing functional improvement in reablement – a qualitative study                                                        | To investigate and discuss how PTs on reablement teams plan and adapt training interventions to enhance users' functional abilities        | Field study, including observation and interviews<br>Thematic content analysis | Reablement | N/A | 4-6 weeks (with some exceptions)*                    | PTs<br>OTs<br>Nurses<br>Home trainers/assistants*                                  | 7 reablement participants included in the study | 7 PTs and 7 home trainers (+ 7 clients)                                                                                                                      | Identified three main categories of interventions: (i) exercise-based training, (ii) activity-based training, or (iii) a combination of both exercise and activity-based training. | Exercise strategies were emphasized differently between cases. | Not reported  | Not reported | Not reported |
| <b>Qualitative studies; older adults' perspectives (n=7)</b> |                                                                                                                             |                                                                                                                                            |                                                                                |            |     |                                                      |                                                                                    |                                                 |                                                                                                                                                              |                                                                                                                                                                                    |                                                                |               |              |              |
| Hjelle et al. <sup>69</sup><br>2017<br>Norway                | Driving forces for home-based reablement; a qualitative study of older adults' experiences                                  | To describe older adults experience of reablement                                                                                          | Qualitative; Interviews (part of larger research program; Tuntland 2015)       | Reablement | N/A | Max 3 months                                         | OT<br>PT<br>Nurses<br>Auxiliary nurses<br>Assistants / students<br>Social educator | Older adults aged; 64-92                        | 8 older adults                                                                                                                                               | Same as Tuntland 2015                                                                                                                                                              | Same as Tuntland 2015                                          | Some reported | Not reported | Not reported |

|                                                      |                                                                                                                                     |                                                                                                                                                                   |                                                                                       |                       |     |                                                            |                                                                                                       |                                                                                                                                                        |                              |                                                                                                                                                                                                      |                                                                                                                                                                                                                                                                                          |               |              |              |
|------------------------------------------------------|-------------------------------------------------------------------------------------------------------------------------------------|-------------------------------------------------------------------------------------------------------------------------------------------------------------------|---------------------------------------------------------------------------------------|-----------------------|-----|------------------------------------------------------------|-------------------------------------------------------------------------------------------------------|--------------------------------------------------------------------------------------------------------------------------------------------------------|------------------------------|------------------------------------------------------------------------------------------------------------------------------------------------------------------------------------------------------|------------------------------------------------------------------------------------------------------------------------------------------------------------------------------------------------------------------------------------------------------------------------------------------|---------------|--------------|--------------|
| Wilde et al. <sup>72</sup><br>2012<br>United Kingdom | 'If they're helping me then how can I be independent?'<br>The perceptions and experience of users of home-care re-ablement services | Not clearly stated, but the title informs that the perceptions and experience of users of home-care re-ablement services are in focus.                            | Interviews                                                                            | Home-care re-ablement | N/A | Normally up to 6 weeks, with some flexibility*             | Home care staff that had received additional training. OTs regarded as essential members of the team* | 74% of service users were >65 years.                                                                                                                   | 34 service users 10 carers   | Focuses on increasing service users ability to perform tasks such as getting up, washing, bathing, moving around the home and other daily living activities such as preparing drinks and light meals | Not reported                                                                                                                                                                                                                                                                             | Some reported | Not reported | Not reported |
| Gustafsson et al. <sup>68</sup><br>2019<br>Sweden    | 'Best fit' caring skills of an interprofessional team in short-term goal-directed re-ablement: older adults' perceptions            | To illuminate older adults' perceptions of multi-professional team's caring skills as success factors for health support in short-term goal-directed re-ablement. | A descriptive qualitative design with a phenomenographic approach based on interviews | Reablement            | N/A | 3 months                                                   | Nurse<br>Enrolled nurse<br>PT<br>Social worker<br>OT<br>Social assessment officers.                   | People 65 years of age or older' who had applied for municipal home care and received short-term, goal-directed re-ablement after a period at hospital | 23 older adults              | Not reported                                                                                                                                                                                         | Not reported                                                                                                                                                                                                                                                                             | Not reported  | Not reported | Not reported |
| Moe et al. <sup>71</sup><br>2016<br>Norway           | Optimising Capacity—A Service User and Caregiver Perspective on Reablement                                                          | To generate a grounded theory of service users' and their caregivers' experiences of reablement                                                                   | Grounded theory; focus groups, interviews and observation                             | Reablement            | N/A | Average duration of 6 weeks, maximal duration of 6 months* | Nurse<br>OTs<br>PTs<br>Nurse assistants                                                               | Older adults                                                                                                                                           | 17 services users, 10 carers | Includes doing activities of daily life at home and in the neighborhood. Professionals facilitate the process with repetitive practice of activities.                                                | Exercises and other therapeutic activities are based on a detailed screening that identifies activity goals and functional impairments. Physical strengthening primarily involves remedying muscular weakness evoked through long-time passivity or immobility after disease and surgery | Some reported | Not reported | Not reported |



|                                                |                                                                                                                                   |                                                                                                                                                                             |                                                                                                          |            |     |                                        |                                                                                    |                                                              |                                                                                                                          |                                                                                                                                                                                                                                          |                       |                                                                                                                          |              |              |
|------------------------------------------------|-----------------------------------------------------------------------------------------------------------------------------------|-----------------------------------------------------------------------------------------------------------------------------------------------------------------------------|----------------------------------------------------------------------------------------------------------|------------|-----|----------------------------------------|------------------------------------------------------------------------------------|--------------------------------------------------------------|--------------------------------------------------------------------------------------------------------------------------|------------------------------------------------------------------------------------------------------------------------------------------------------------------------------------------------------------------------------------------|-----------------------|--------------------------------------------------------------------------------------------------------------------------|--------------|--------------|
| Moe et al. <sup>70</sup><br>2017<br>Norway     | Patient influence in home-based reablement for older persons: qualitative research                                                | To gain knowledge about conversation processes and patient influence in formulating the patients' goals                                                                     | A qualitative field study exploring cases of naturally occurring conversations between patients and HCPs | Reablement | N/A | 4-6 weeks.                             | OT<br>PT<br>Nurse<br>Care workers                                                  | Older adults aged 67-90.                                     | 8 older adults and 14 HCPs (OT, PT, nurse, care workers). Some spouses participated in conversations                     | Not reported                                                                                                                                                                                                                             | Not reported          | Not reported                                                                                                             | Not reported | Not reported |
| Bodker et al. <sup>67</sup><br>2019<br>Denmark | Home care as reablement or enabling arrangements? An exploration of the precarious dependencies in living with functional decline | To explore how the assumptions about independence embedded in the concept's linguistic parts – 're', 'able' and 'ment' – map onto lives characterized by functional decline | Ethno-graphic fieldwork                                                                                  | Reablement | N/A | 8 weeks                                | Assessor<br>Therapist<br>Nurse                                                     | Older adults                                                 | Fieldwork in two municipal units, including 28 assessment meetings with 31 older people (of which 8 received reablement) | Individualized training program, including recurrent home training in everyday activities (e.g. vacuum cleaning or taking a bath), managed by a home helper and typically took place one to three times a week depending on the activity | Not reported          | Not reported                                                                                                             | Not reported | Not reported |
| Magne et al. <sup>73</sup><br>2020<br>Norway   | Promoting Participation in Daily Activities Through Reablement: A Qualitative Study                                               | To describe how older adults engage in daily activities within the context of receiving reablement and to explore participation in daily activities.                        | Interviews, analyzed using systematic text condensation (STC)                                            | Reablement | N/A | 6 weeks or less, with some exceptions* | OTs<br>PTs<br>Homecare workers                                                     | Older adults (aged 70-94 years)                              | 10 Older adults.                                                                                                         | Not reported                                                                                                                                                                                                                             | Not reported          | Describes and explores older adults' experiences of engaging in daily activities and exercises when receiving reablement | Not reported | Not reported |
| <b>Perspectives of family members (n=2)</b>    |                                                                                                                                   |                                                                                                                                                                             |                                                                                                          |            |     |                                        |                                                                                    |                                                              |                                                                                                                          |                                                                                                                                                                                                                                          |                       |                                                                                                                          |              |              |
| Hjelle et al. <sup>74</sup><br>2017<br>Norway  | The relatives' voice: how do relatives experience participation in reablement? A qualitative study                                | To explore and describe how relatives experience participation in the reablement process                                                                                    | Qualitative; Interviews (part of larger research program; Tuntland 2015)                                 | Reablement | N/A | Max 3 months                           | OT<br>PT<br>Nurses<br>Auxiliary nurses<br>Assistants / students<br>Social educator | Adults >18 with functional decline in one or more activities | Six relatives (spouse, child or other kinship)                                                                           | Same as Tuntland 2015                                                                                                                                                                                                                    | Same as Tuntland 2015 | Some reported                                                                                                            | Not reported | Not reported |

|                                                 |                                                                                                                                            |                                                                                                                                                        |                                                                                         |            |     |           |                               |                              |                                                                                                          |              |              |               |              |              |
|-------------------------------------------------|--------------------------------------------------------------------------------------------------------------------------------------------|--------------------------------------------------------------------------------------------------------------------------------------------------------|-----------------------------------------------------------------------------------------|------------|-----|-----------|-------------------------------|------------------------------|----------------------------------------------------------------------------------------------------------|--------------|--------------|---------------|--------------|--------------|
| Jakobsen et al. <sup>75</sup><br>2019<br>Norway | The art of maintaining everyday life: collaboration among older parents, their adult children, and health care professionals in reablement | To identify how adult children perceive the collaboration between older parents, family members, and health care professionals in reablement services. | Interviews. Qualitative research design with a constructivist grounded theory approach. | Reablement | N/A | 4-6 weeks | PTsOTsR<br>NsAuxiliary nurses | Older adults 74-93 years old | 15 adult children (Eight daughters, six sons and a daughter-in-law of older adults receiving reablement) | Not reported | Not reported | Some reported | Not reported | Not reported |
|-------------------------------------------------|--------------------------------------------------------------------------------------------------------------------------------------------|--------------------------------------------------------------------------------------------------------------------------------------------------------|-----------------------------------------------------------------------------------------|------------|-----|-----------|-------------------------------|------------------------------|----------------------------------------------------------------------------------------------------------|--------------|--------------|---------------|--------------|--------------|

\* information from personal contact with author.

PA = Physical activity, HCPs =Healthcare providers, OT= Occupational therapist, PT= Physiotherapist, RN= Registered nurse, TUG= Timed up and go, RCT = Randomized controlled trial, ADL = Activities of daily living, SPPB= Short Physical Performance Battery, PASE= physical activity scale for the elderly
